# Supplementary material for: Phase selectively soluble dendrimer-bound osmium complex: a highly effective and easily recyclable catalyst for olefin dihydroxylationElectronic supplementary information (ESI) available: synthesis details, characterization of the osmium complexes, dihydroxylation and recycling procedure. See http://www.rsc.org/suppdata/cc/b4/b401994f/
Source: Royal Society of Chemistry journal article supplement (doi:10.1039/b401994f), 2004-01-01

## Supplementary Information

**Phase selectively soluble dendrimer-bound osmium complex: a highly effective and easily recyclable catalyst for olefin dihydroxylation**

**General:** 1H NMR and 13C NMR spectra were recorded on a Bruker Model Avance DMX 300 Spectrometer (1H 300 MHz and 13C 75 MHz respectively). Chemical shift are given in ppm and are referenced to residual solvent peaks (1H and 13C NMR). Column chromatography was performed using silica gel (230-400 mesh) or Al2O3 (200–300 mesh) with petroleum ether/ethyl acetate as eluent. Potassium osmate dihydrate (K2OsO4), N-methyl-morpholine-N-Oxide (NMO), 1-octene, 1-decene, 1-dodecene and 1,1-diphenylethene were purchased from Acros. Other olefins, solvents and chemicals were obtained from commercial sources and were used without further purification.

# Synthesis of the dendritic ligands (L1 and L2)

**N,N-di(3`,4`,5`-tri(n-decan-1-yloxy)benzyl)-4-aminopyridine**[1] **(L1):** A 50 ml oven dried three-necked flask was charged with sodium hydride (0.4 g , 10 mmol, 60% in mineral oil), 4-aminopyridine (94 mg, 1 mmol) and THF (8 ml). The mixture was stirred under an atmosphere of nitrogen at room temperature for 1 h. A solution of 3,4,5-tri(n-decan-1-yloxy)benzyl chloride[2] (1.48 g, 2.05 mmol) in 2 ml of THF was added dropwise and heated to reflux for additional 5h. After quenched with saturated NH4Cl (5 ml), the solvent was removed under reduced pressure. H2O (10 ml) and CH2Cl2 (20 ml) were then added and the organic layer was separated, washed with brine (20 ml), dried over the anhydride Na2SO4. Solvent was removed under reduced pressure to afford the crude product, which was further purified by flash column chromatography (Al2O3), affording a colorless oil (0.727g, 60%). 1H NMR (300 MHz, CDCl3): δ 8.21 (d, *J*=5.7 Hz, 2H), 6.61 (d, *J*=5.9 Hz, 2H), 6.33 (s, 4H), 4.52 (s, 4H), 3.83 – 3.94 (m, 12H), 1.69 – 1.76 (m, 12H), 1.38 – 1.45 (m, 12H), 1.27 (br, 72H), 0.88 – 0.90 (t, *J*=6.0 Hz, 18H) ppm. 13C NMR (75 MHz, CDCl3): δ 154.0, 153.5, 149.9, 137.4, 131.8, 107.1, 104.9, 73.4, 69.1, 53.2, 31.8, 30.3, 29.9, 29.7, 29.6, 29.3, 26.1, 26.0, 22.6, 14.0 ppm. HRMS (FAB): calcd. for C79H138N2O6 [M+H]+ 1212.0633, found 1212.0649.

**1,2-di(3`,4`,5`-tri(n-decan-1-yloxy)benzyloxy)methyl-4,5-dimethyl-cis-Δ4-tetra- hydrobenzene (L2):** A procedure similar to that for the preparation of **L1** was used to synthesis **L2** by using otherwise 4,5-dimethyl-cis-Δ4-tetrahydrophthalyl alcohol[3] (171 mg, 1 mmol) as the starting material. Yield: 65%. 1H NMR (300 MHz, CDCl3): δ 6.51 (s, 4H), 4.40 – 4.35 (m, 4H), 3.97 – 3.90 (m, 12H), 3.46 – 3.26 (m, 4H), 2.24 – 1.89 (m, 6H), 1.78 – 1.69 (m, 12H), 1.58 (s, 6H), 1.46 (br, 12H), 1.27 (br, 72H), 0.88 (t, *J*=6.2 Hz, 18H) ppm. 13C NMR (75 MHz, CDCl3): δ153.0, 137.4, 133.7, 123.7, 105.9, 73.3, 73.1, 71.3, 69.0, 35.4, 33.5, 31.9, 30.3, 29.7, 29.6, 29.4, 29.3, 26.1, 22.6, 18.9, 14.0 ppm. HRMS (FAB): calcd. for C84H150O8 [M+Na]+ 1310.1228, found 1310.1189.

# Preparation of the dendritic Os catalyst (C1 and C2):

**Dendritic C1:** To avoid handling the poisonous OsO4, hexavalent K2OsO2(OH)4 was used as an Os source, and oxidized *in situ* to OsO4 with NMO in tert-butyl alcohol/hexane = 2:1[4] (6 ml). **L1** was then added to the above OsO4 solution with **L1**/OsO4 = 1.2 (mole ratio). After the mixture was stirred in 10 min, water (5ml) was added and resulted in phase separation. The upper yellow organic layer was separated and evaporated under reduced pressure to afford catalyst **C1**.

**Dendritic C2 and Os(L2)2:** Similarly, **L2** was added to the above OsO4 solution with **L2**/OsO4 = 1 (mole ratio). After the mixture was stirred in 1h, NMO (1 eq) was added and stirred for another 10 min. Water (5ml) was added to the mixture and resulted in phase separation. The upper black organic layer was separated and evaporated under reduced pressure to afford **C2**. MALDI-TOF MS m/z calcd. 1559.1, found 1343.0 [hydrolyzed product + Na]+. No peak of the inactive catalyst Os(**L2**)2 was found. **C2** was further reacted with **L2** (1 eq) followed by oxidized by NMO to give Os(**L2**)2. MALDI-TOF MS m/z calcd. 2846.2, found 2867.1([M+Na]+).

**Experimental procedure for the dihydroxylation of olefins**: To a 25 ml one-neck round-bottomed flask was added osmium catalyst (**C1** or **C2**, 0.02 mmol), NMO (2.2 mmol), olefin (2.0 mmol) and *t-*BuOH-hexane-MeCN-H2O (2:1:1:0.2, v/v, 10.4 ml). The reaction mixture was stirred at room temperature. After completion of the reaction, water (1ml) was added to the reaction mixture and resulted in phase separation. The upper catalyst layer was removed via liquid-liquid phase separation and was further used in the next run. All solvent in the product layer was removed under reduced pressure. The resulted residue was further purified by common chromatography to afford the cis-diol.

**References.**

1. Huang, J. T.; Sun, J. W.; Liu, Z. H. *J. App. Poly. Sci.* **1995**, *56*, 1805-1806.
2. Percec, V.; Ahn, C. H.; Cho, W. D.; Jamieso, A. M. *J. Am. Chem. Soc.* **1998,** *120*, 8619-8631.
3. Balley, W. J.; Rosenberg, J.; Young, L. J. *J. Am. Chem. Soc.* **1954,** *76*, 2251-2254.
4. Lloyd, W. D.; Navarette, B. J.; Shaw, M. F. *Synthesis* **1972**, 610-611.


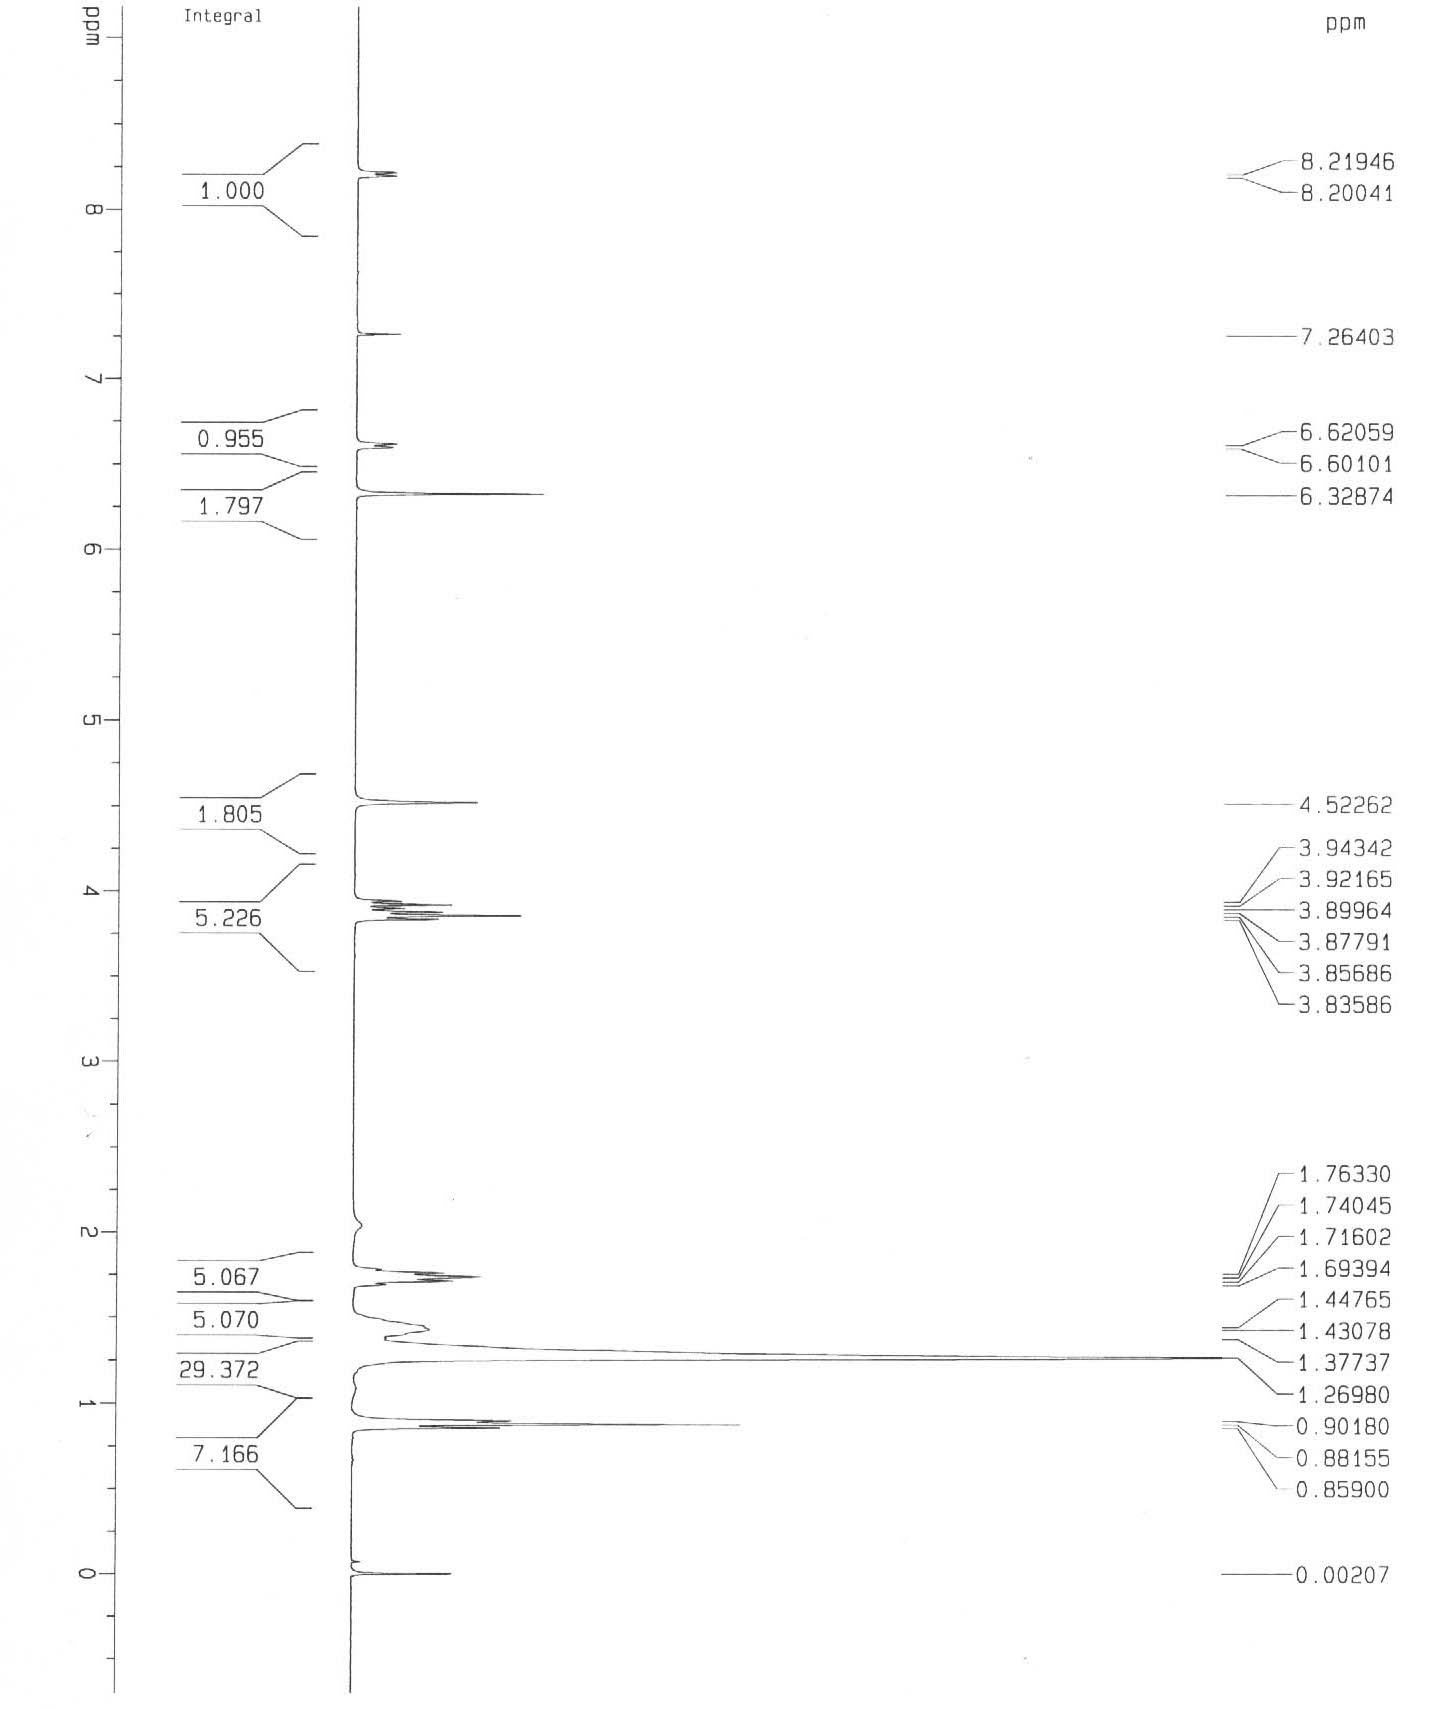


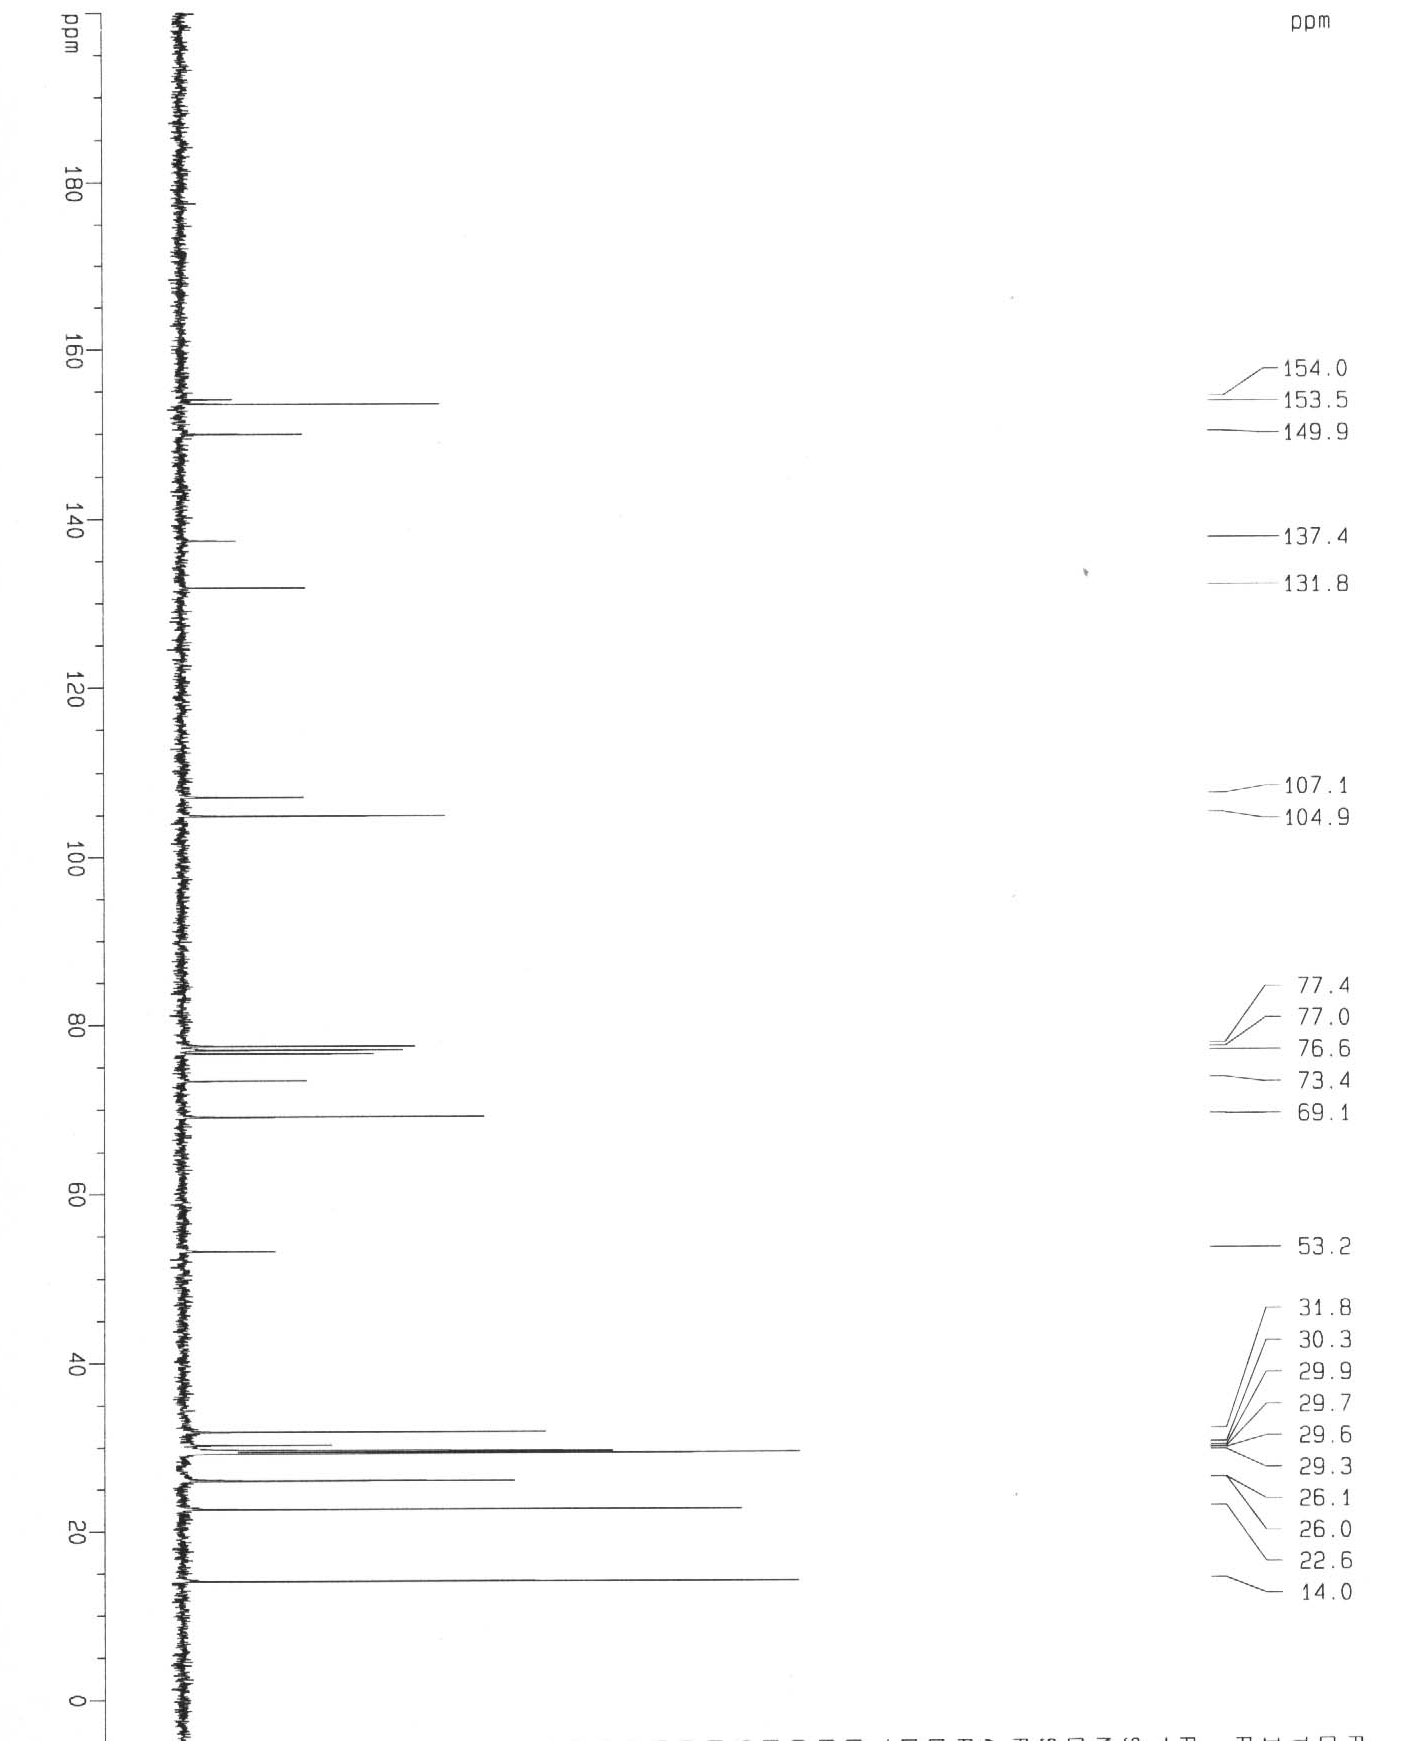


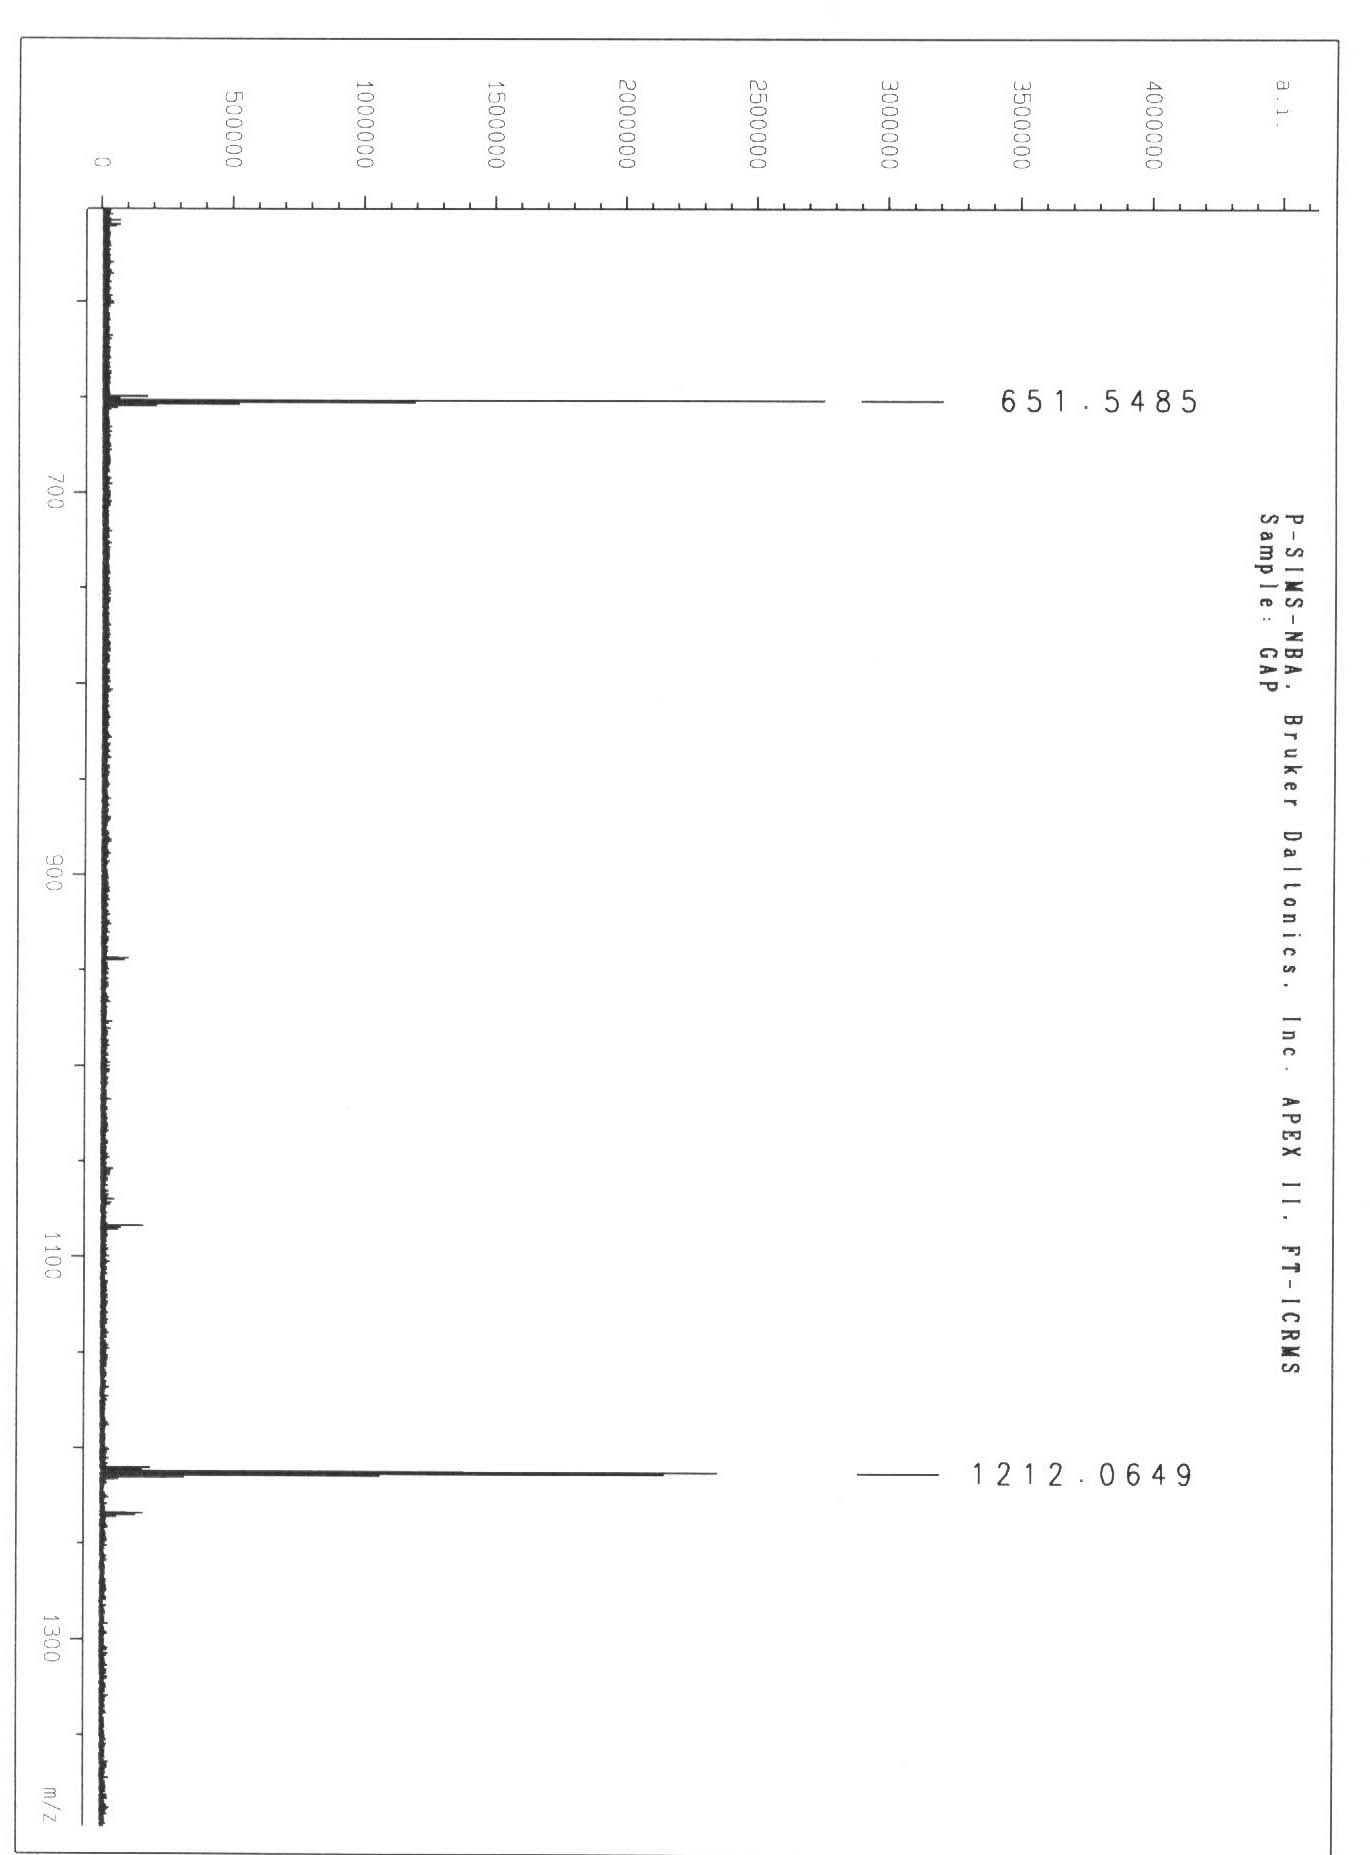


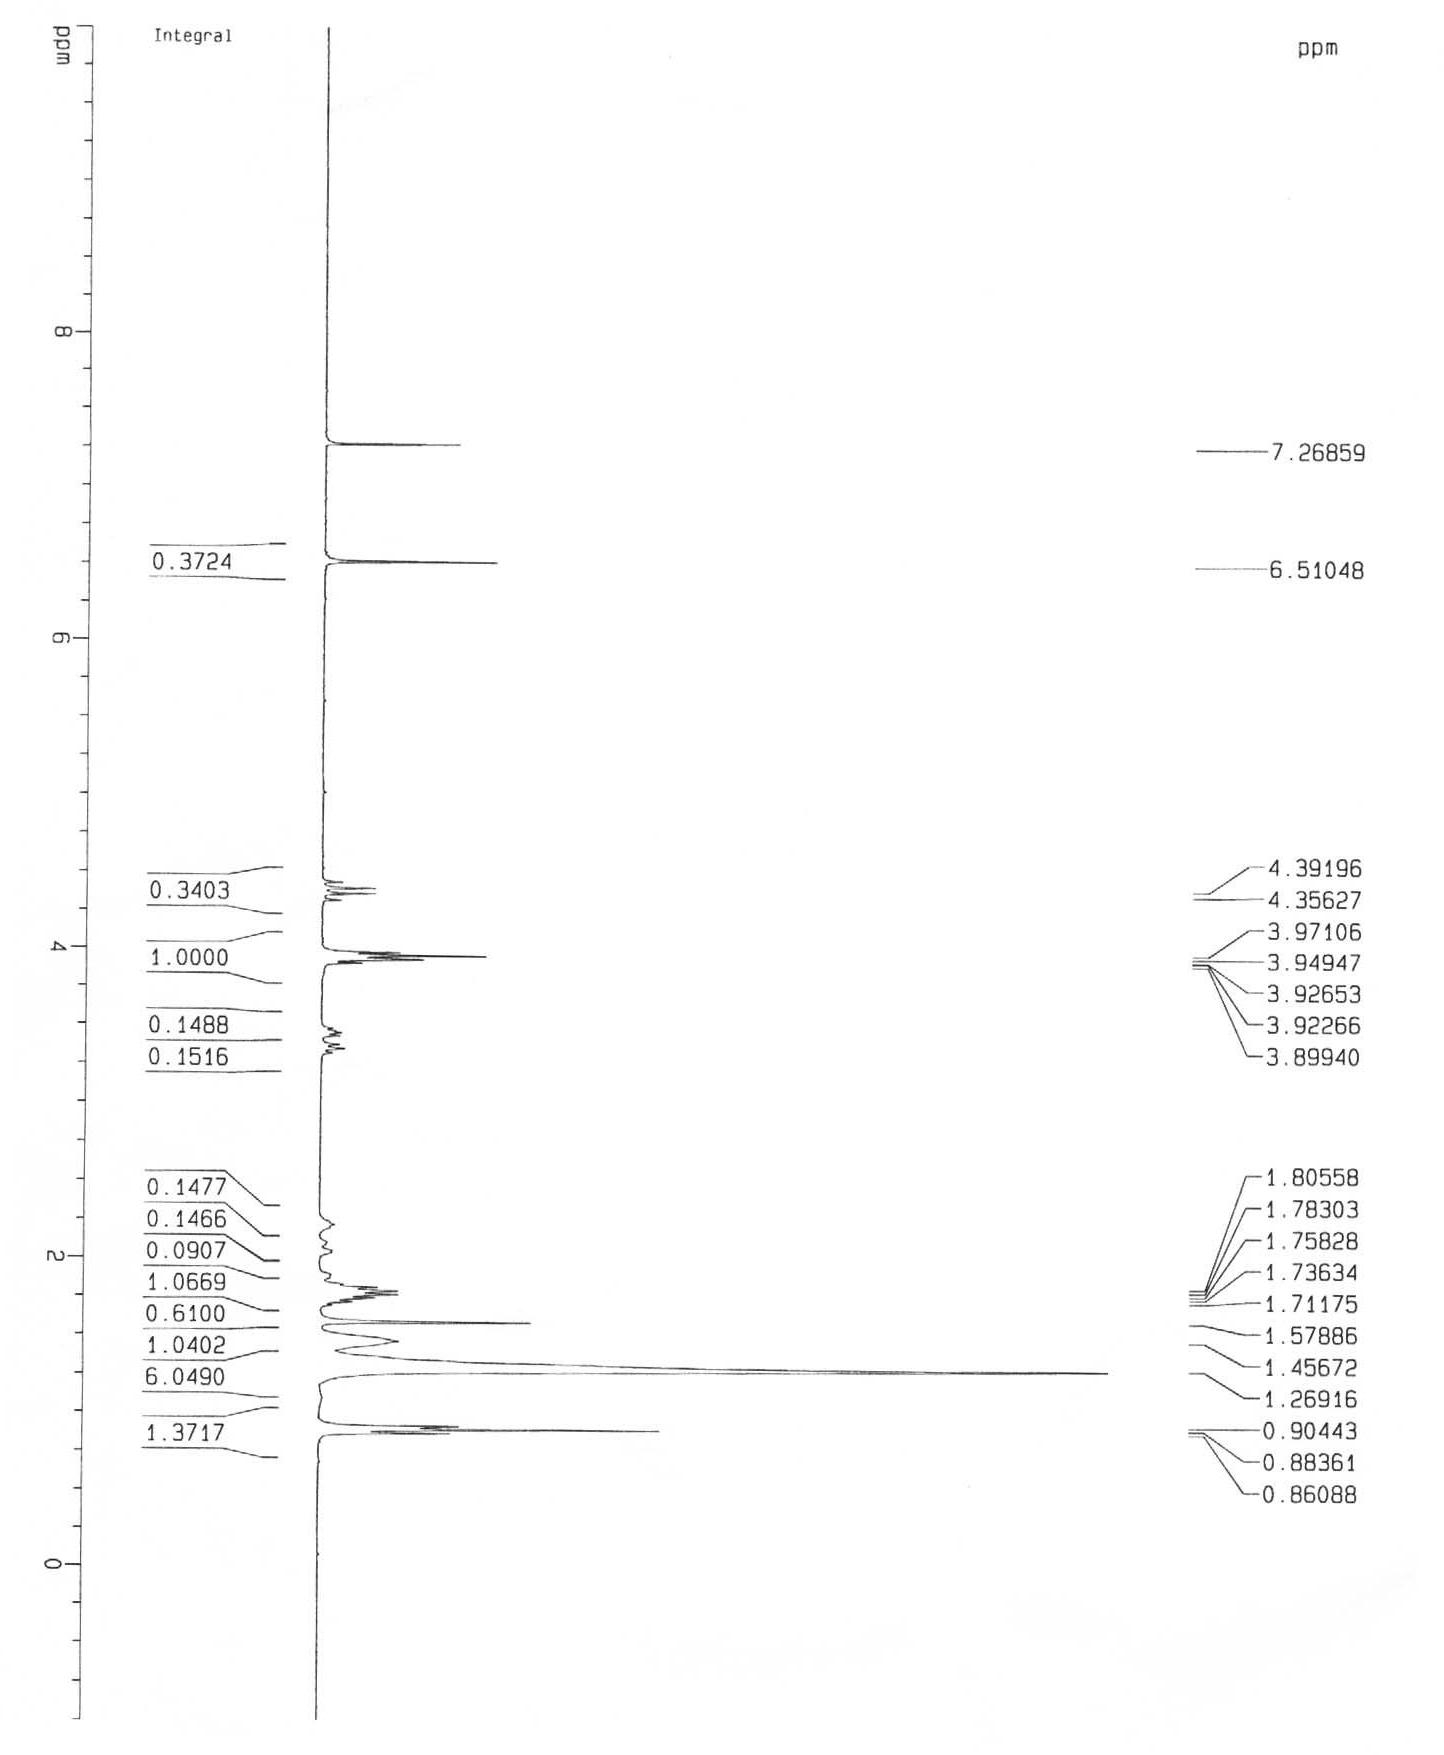


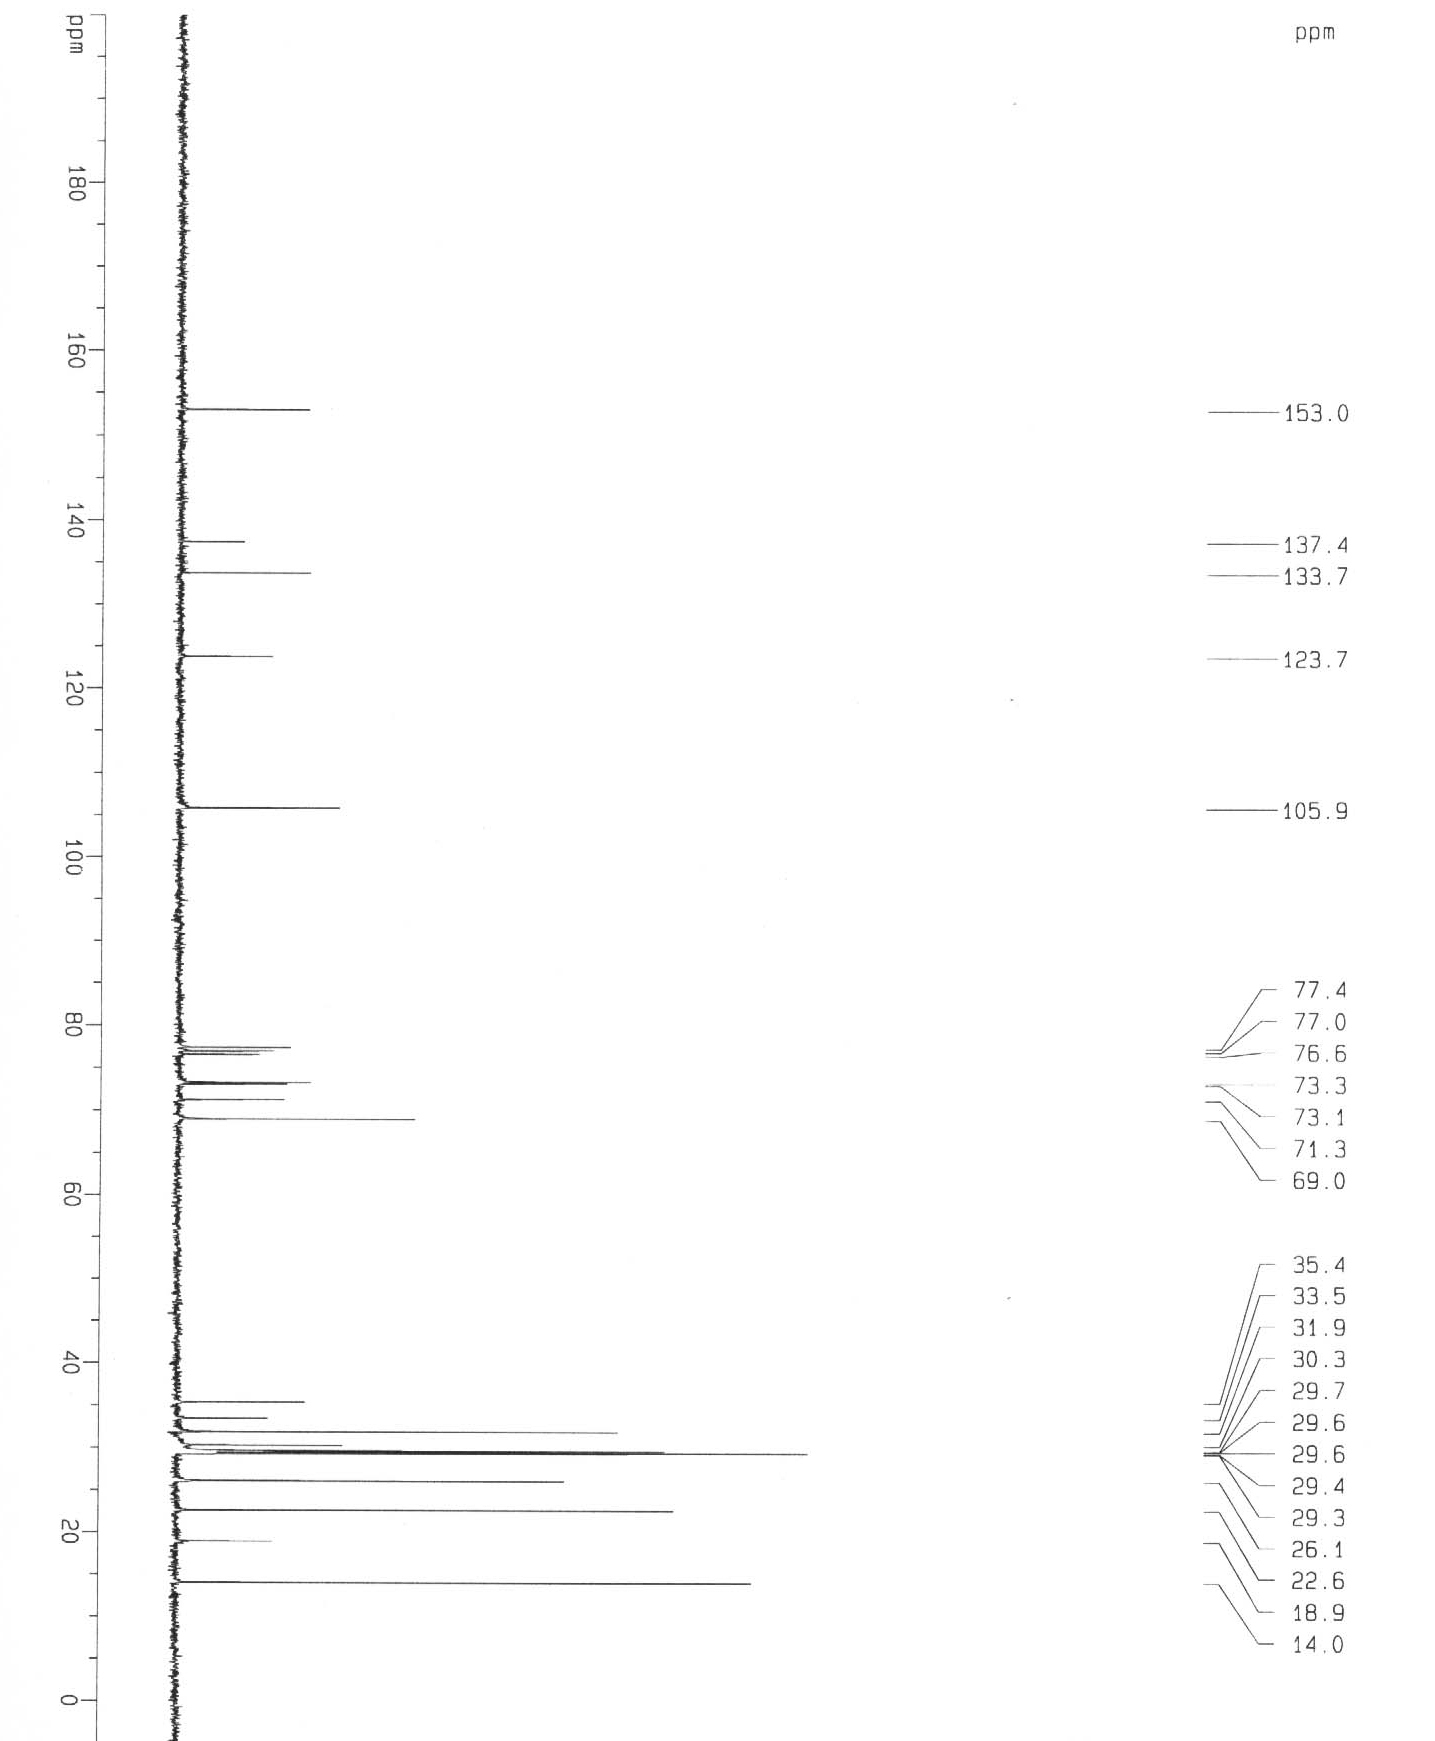


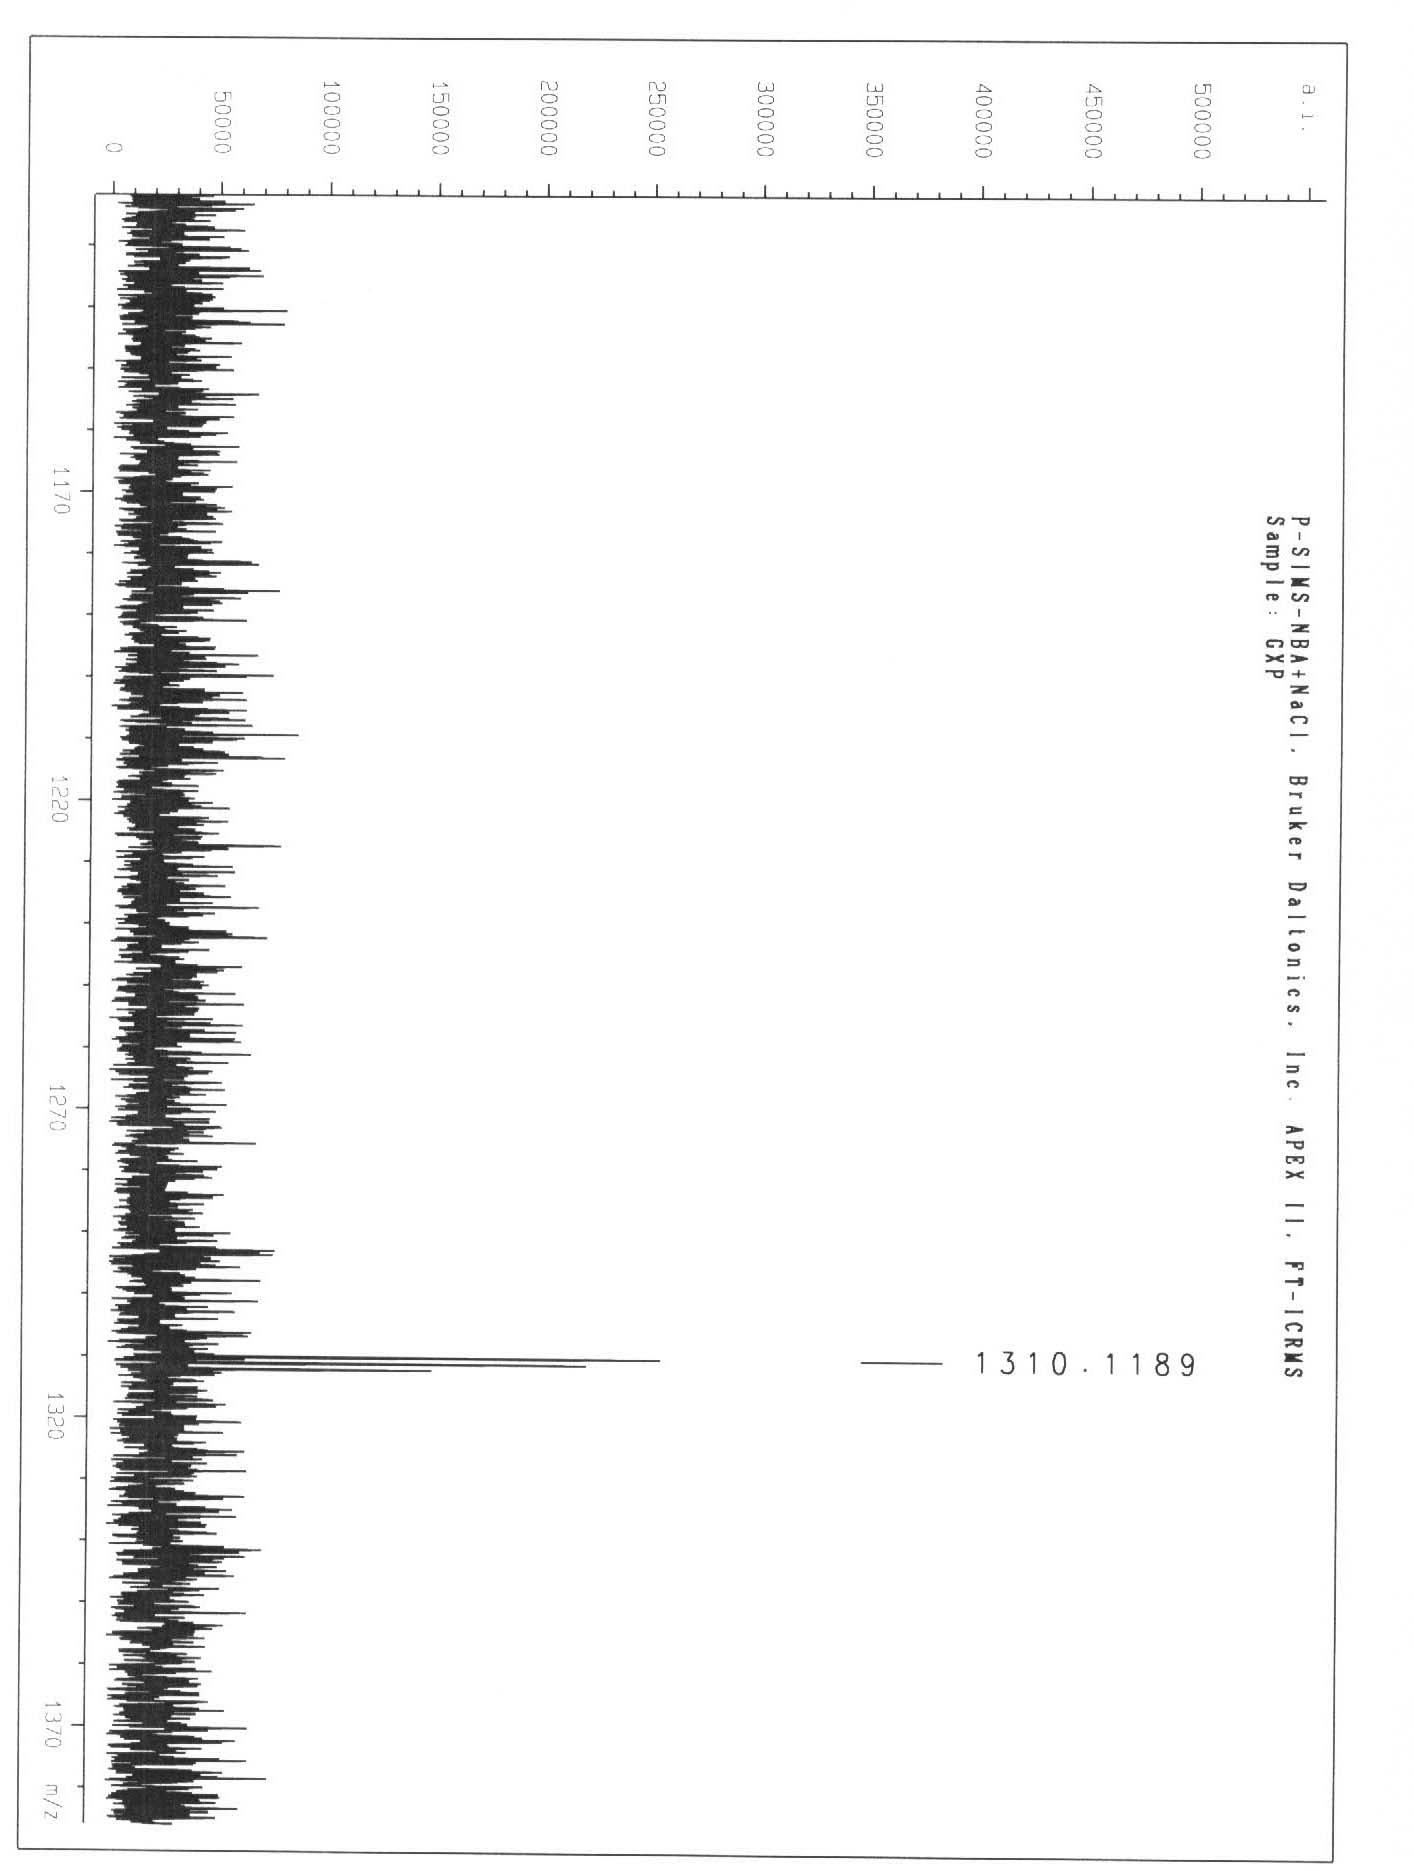


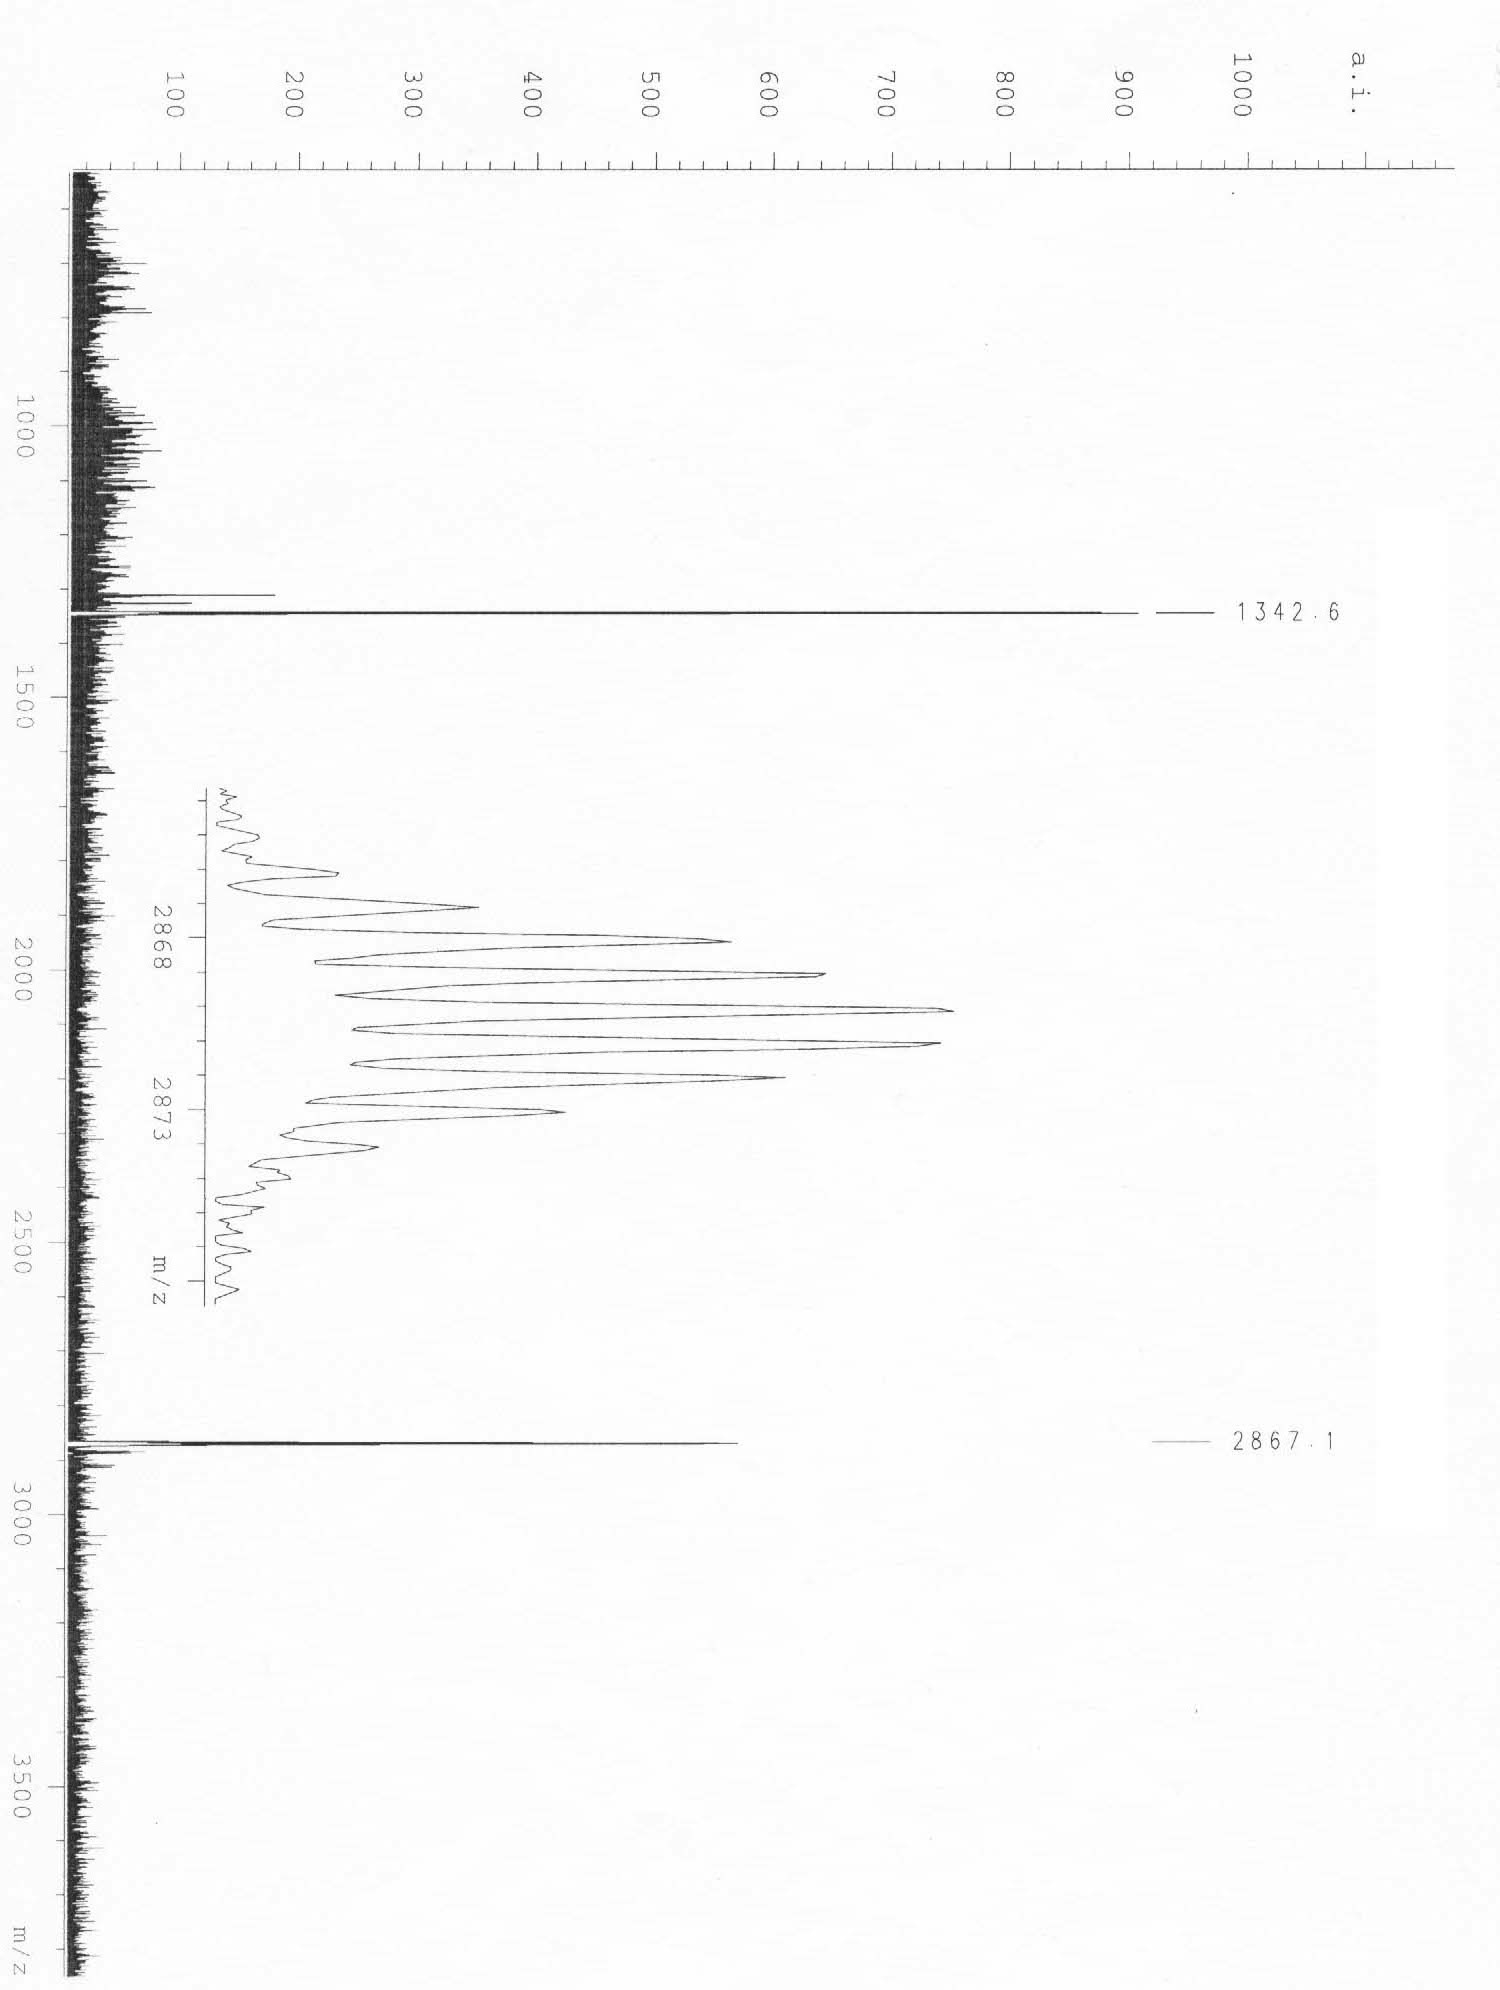


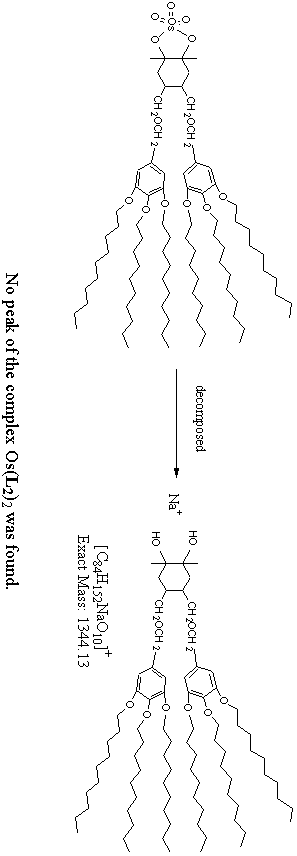

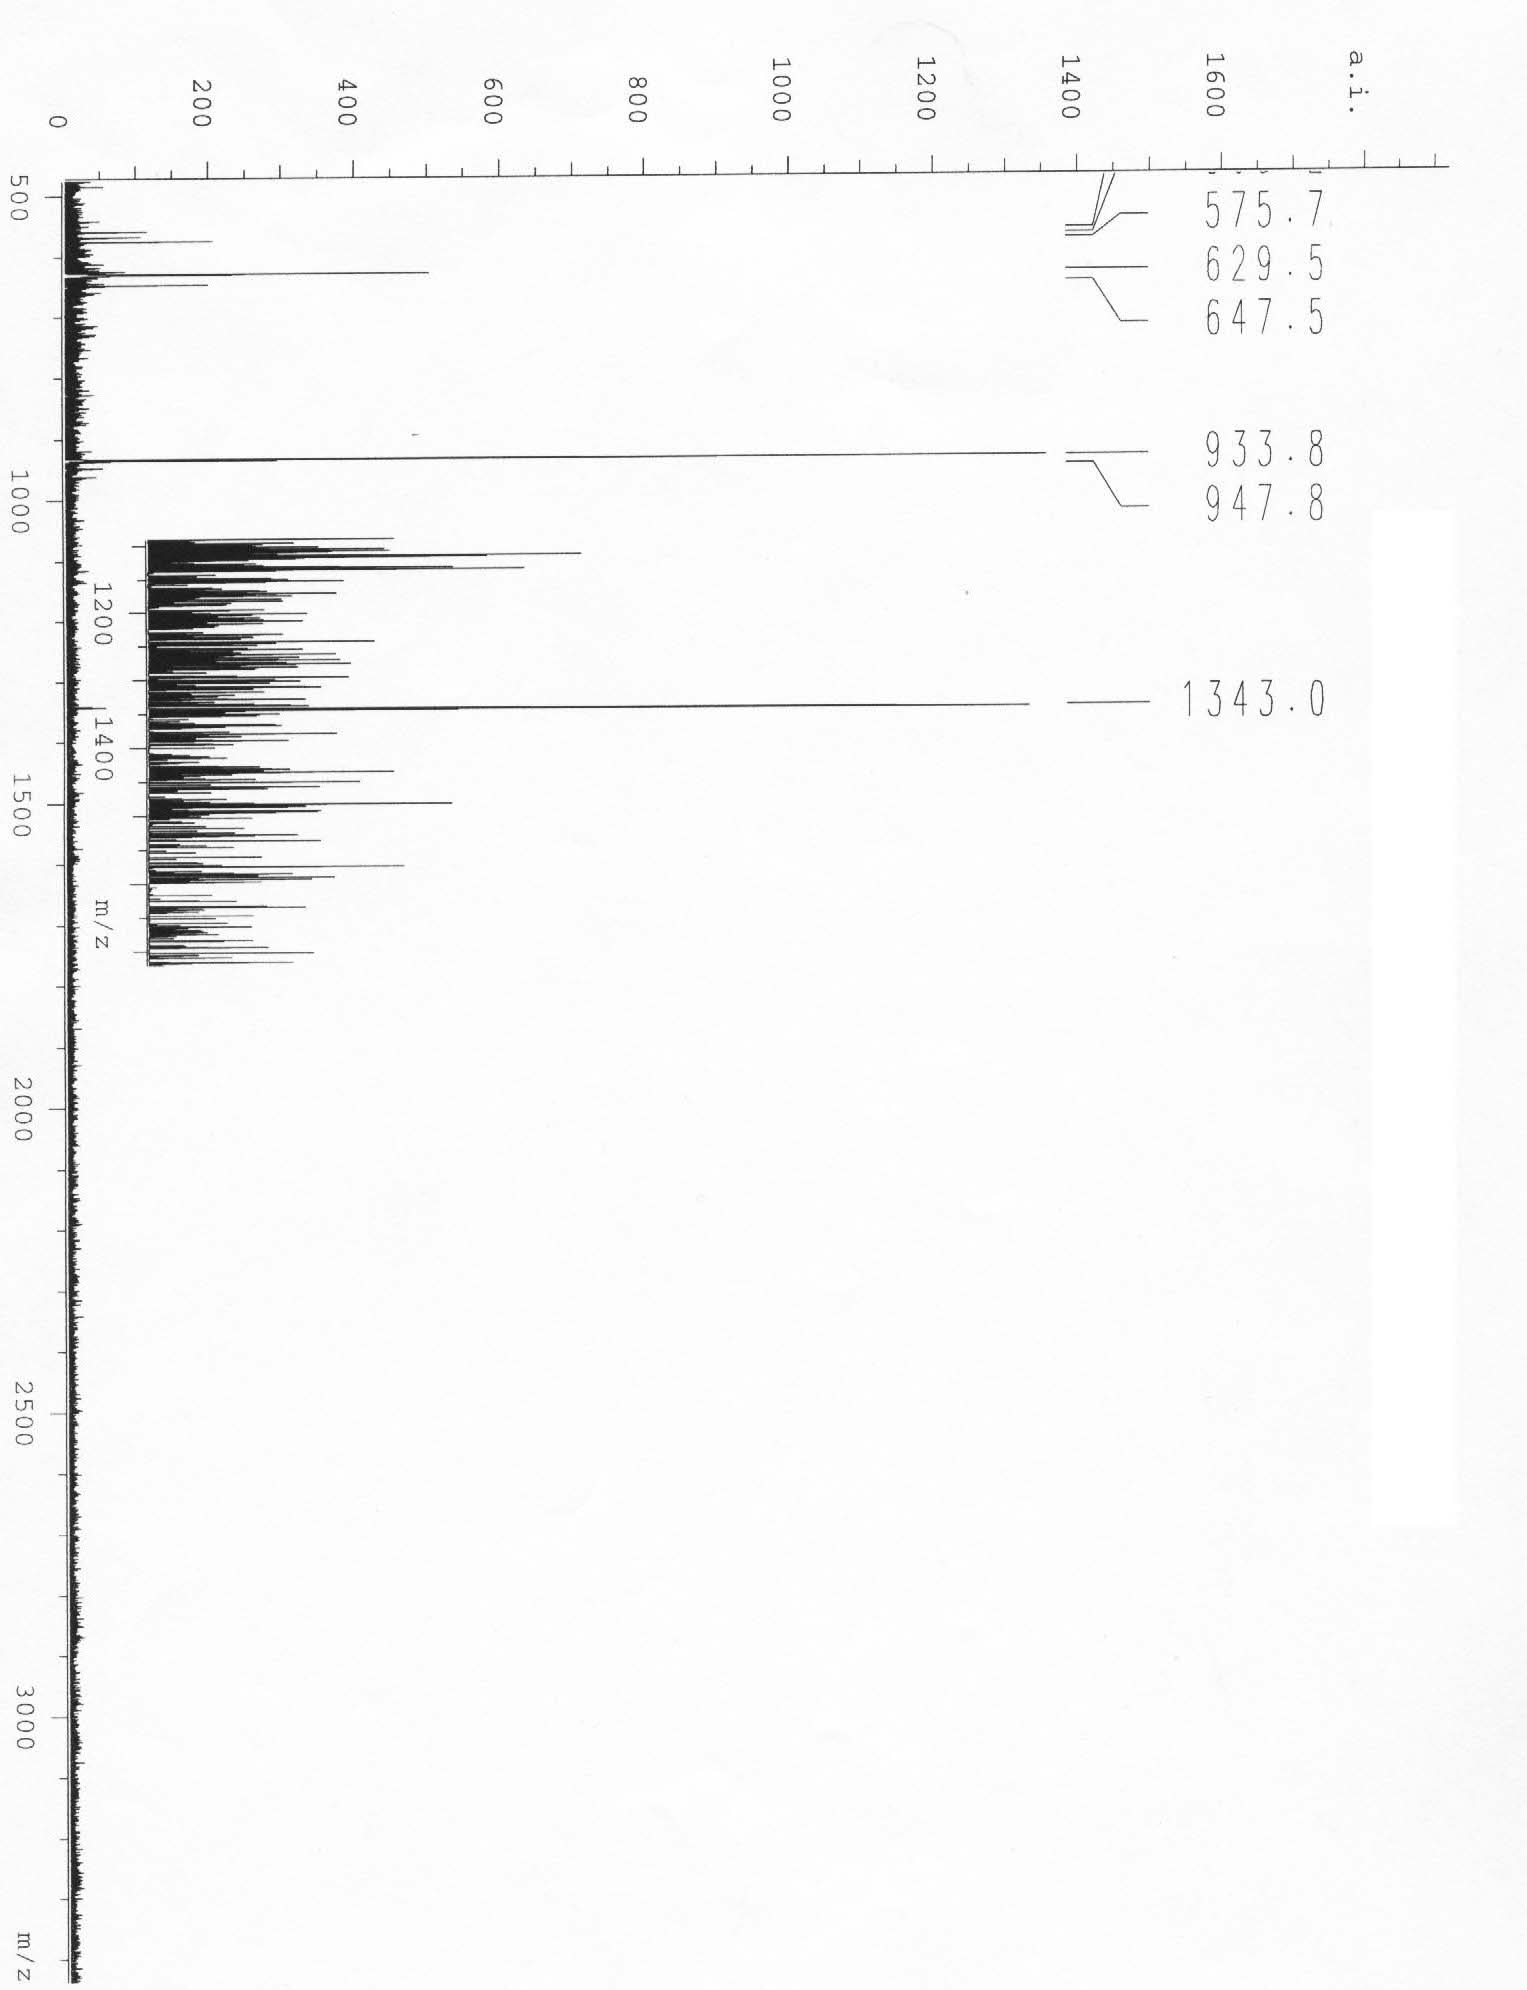

Supplement: b401994f.doc [file b401994f.doc]
